# Supplementary material for: Structures of neurokinin 1 receptor in complex with Gq and Gs proteins reveal substance P binding mode and unique activation features
Source: PubMed Central journal article supplement — Sci Adv. 2021 Dec 8;7(50):eabk2872. doi: 10.1126/sciadv.abk2872 (PMC8654284; doi:10.1126/sciadv.abk2872), 2021-12-08
Supplement: sciadv.abk2872_sm.pdf [file sciadv.abk2872_sm.pdf]

Supplementary Materials for

**Structures of neurokinin 1 receptor in complex with G<sub>q</sub> and G<sub>s</sub> proteins  
reveal substance P binding mode and unique activation features**

Cristian Thom, Janosch Ehrenmann, Santiago Vacca, Yann Waltenspühl, Jendrik Schöppe,  
Ohad Medalia, Andreas Plüeckthun\*

\*Corresponding author. Email: [plueckthun@bioc.uzh.ch](mailto:plueckthun@bioc.uzh.ch)

Published 8 December 2021, *Sci. Adv.* 7, eabk2872 (2021)  
DOI: 10.1126/sciadv.abk2872

**This PDF file includes:**

Figs. S1 to S11  
Tables S1 to S3

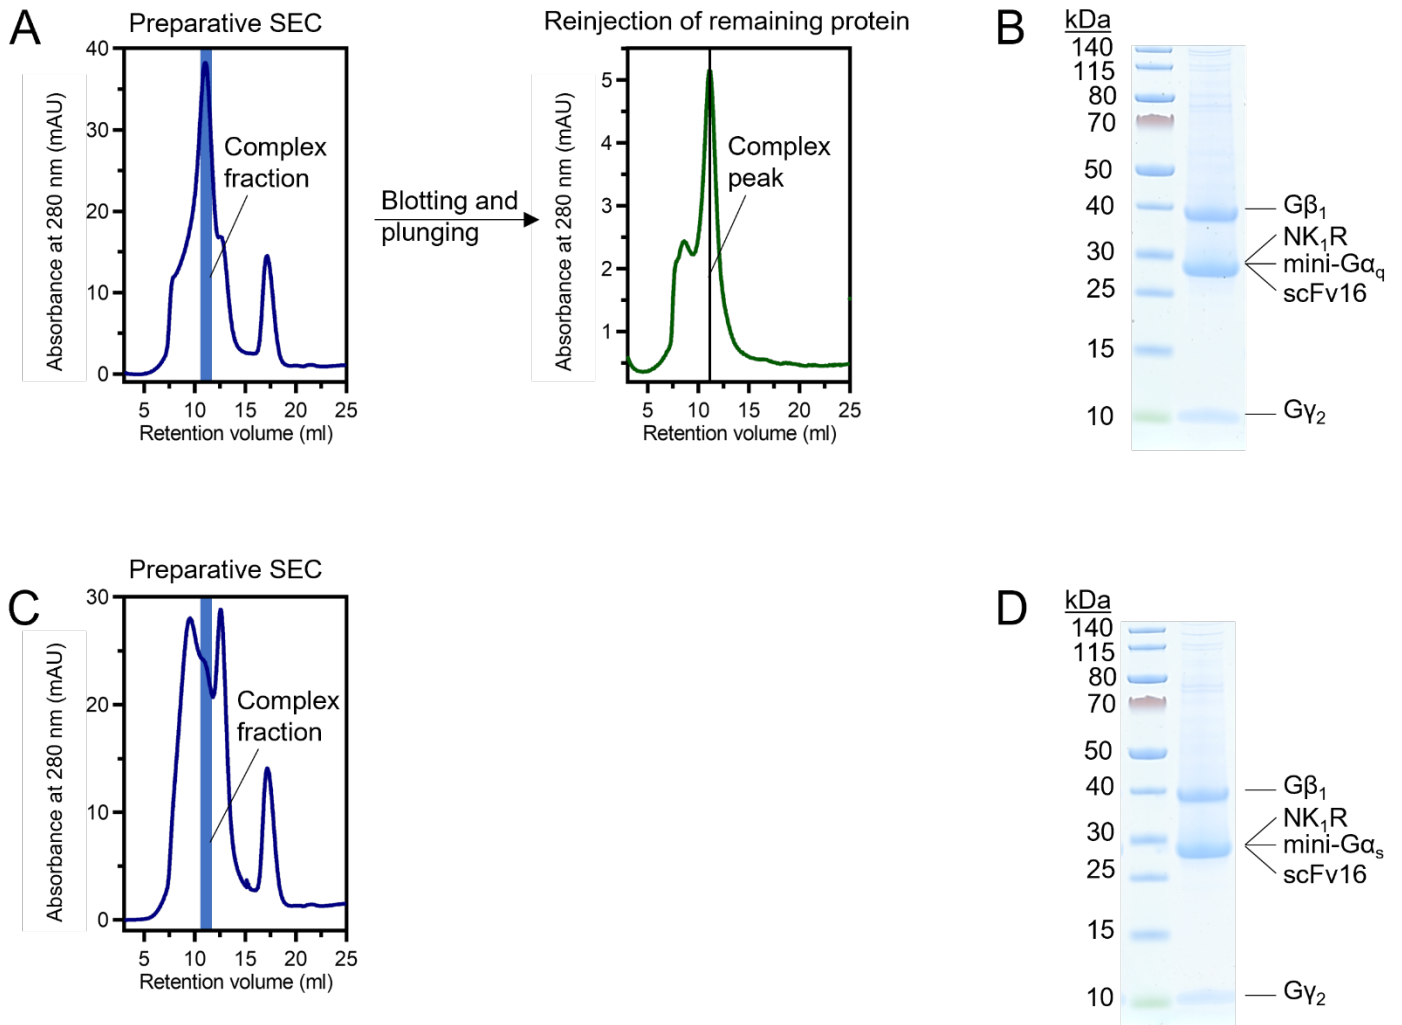

**Fig. S1. NK<sub>1</sub>R complexes: SEC and LDS-PAGE.**

**(A)** SEC of the NK<sub>1</sub>R:G<sub>q</sub> complex. Left: Preparative SEC profile with the collected complex fraction indicated by a blue bar. Right: Analytical SEC profile of the remaining protein (concentrated collected complex fraction) after blotting and plunging (~3 h after fraction collection). Retention volume of the complex: 11.1 ml.

**(B)** LDS-PAGE gel of the NK<sub>1</sub>R:G<sub>q</sub> complex with complex components indicated. NK<sub>1</sub>R, mini-Gα<sub>q</sub>, and scFv16 run at the same apparent molecular weight (confirmed by LDS-PAGE of the individual components, gel not shown).

**(C)** Preparative SEC profile of the NK<sub>1</sub>R:G<sub>s</sub> complex with the collected complex fraction indicated by a blue bar. After blotting and plunging no sufficient quantity of protein for analytical SEC remained.

**(D)** LDS-PAGE gel of the NK<sub>1</sub>R:G<sub>s</sub> complex with complex components indicated. NK<sub>1</sub>R, mini-Gα<sub>s</sub>, and scFv16 run at the same apparent molecular weight (confirmed by LDS-PAGE of the individual components, gel not shown).

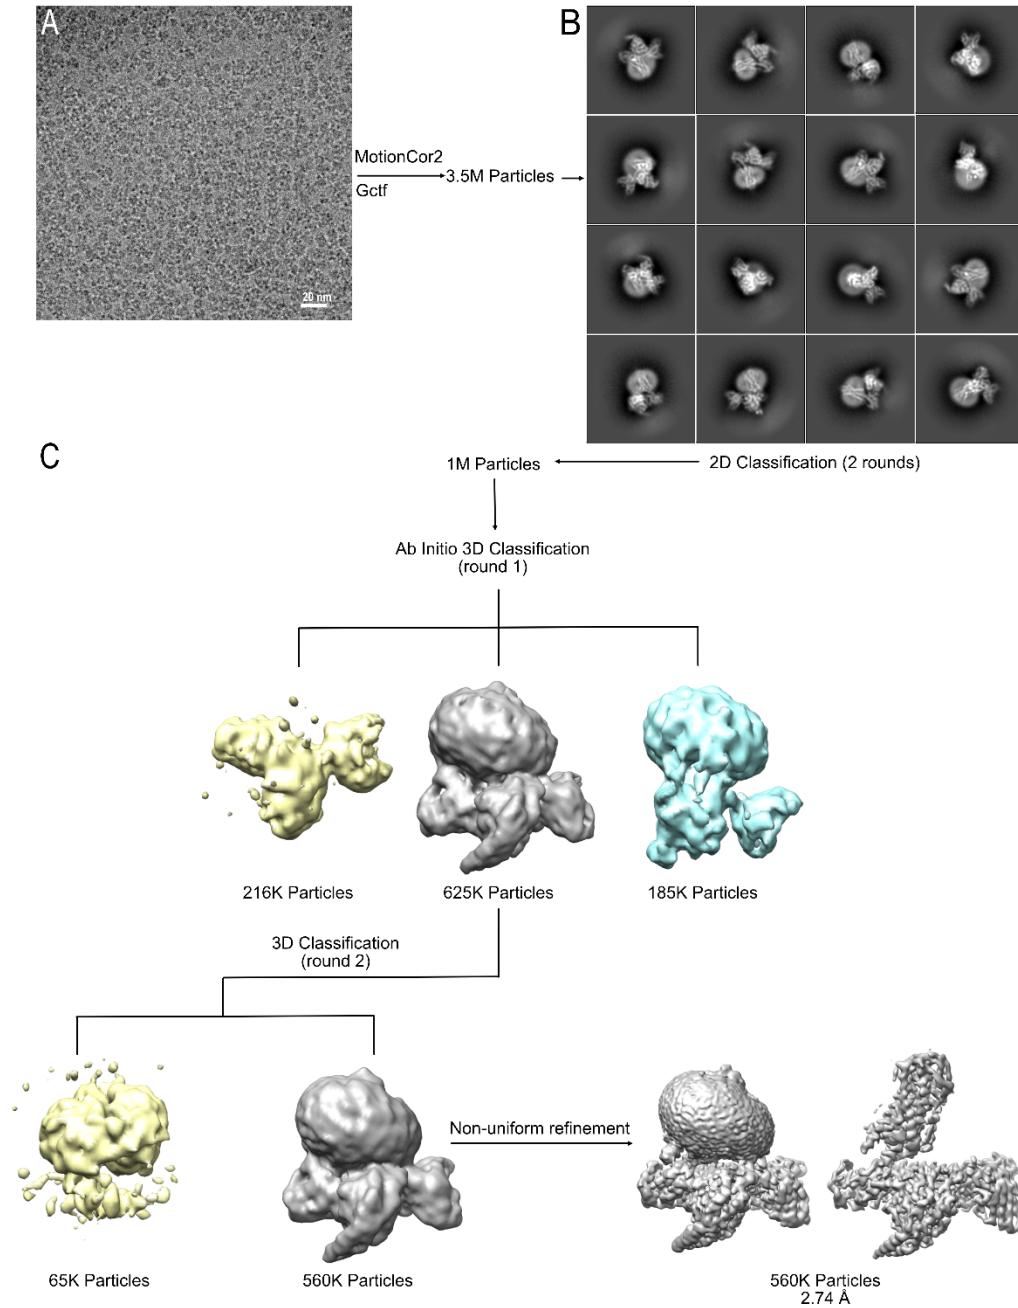

**Fig. S2. Workflow for cryo-EM data processing of the NK<sub>1</sub>R:SP:G<sub>q</sub>:scFv16 complex.**  
**(A)** Representative cryo-EM micrograph of the NK<sub>1</sub>R:SP:G<sub>q</sub>:scFv16 complex. Scale bar, 20 nm.  
**(B)** Representative 2D averages showing distinct secondary structure features from different views of the complex after 2 rounds of 2D classification.  
**(C)** 3D classification workflow and refinement.

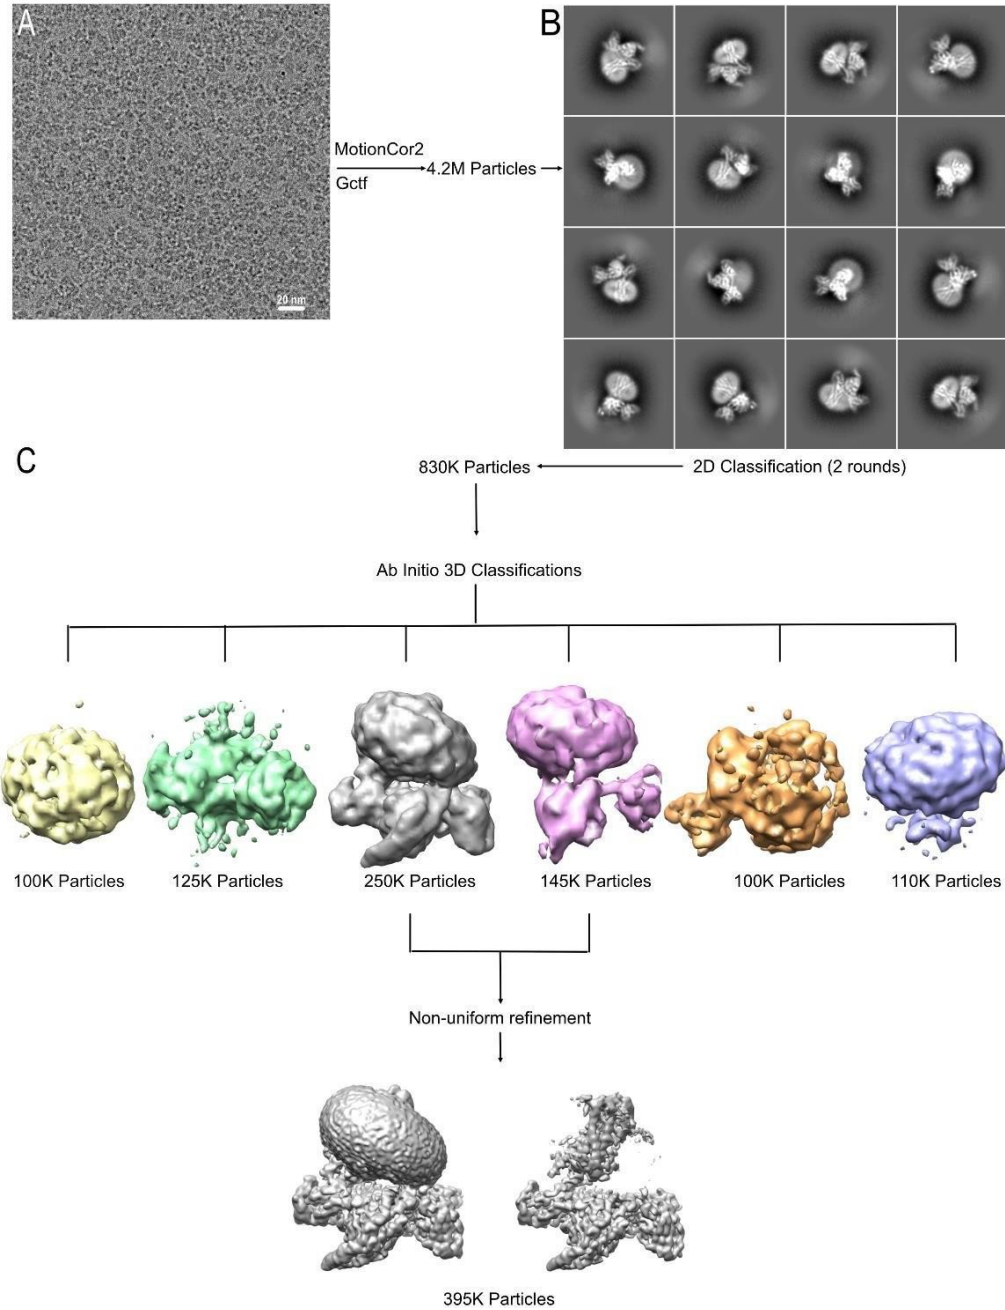

**Fig. S3. Workflow for cryo-EM data processing of the NK<sub>1</sub>R:SP:G<sub>s</sub>:scFv16 complex.**

**(A)** Representative cryo-EM micrograph of the NK<sub>1</sub>R:SP:G<sub>s</sub>:scFv16 complex. Scale bar, 20 nm.

**(B)** Representative 2D averages showing distinct secondary structure features from different views of the complex after 2 rounds of 2D-classification.

**(C)** 3D classification workflow and refinement.

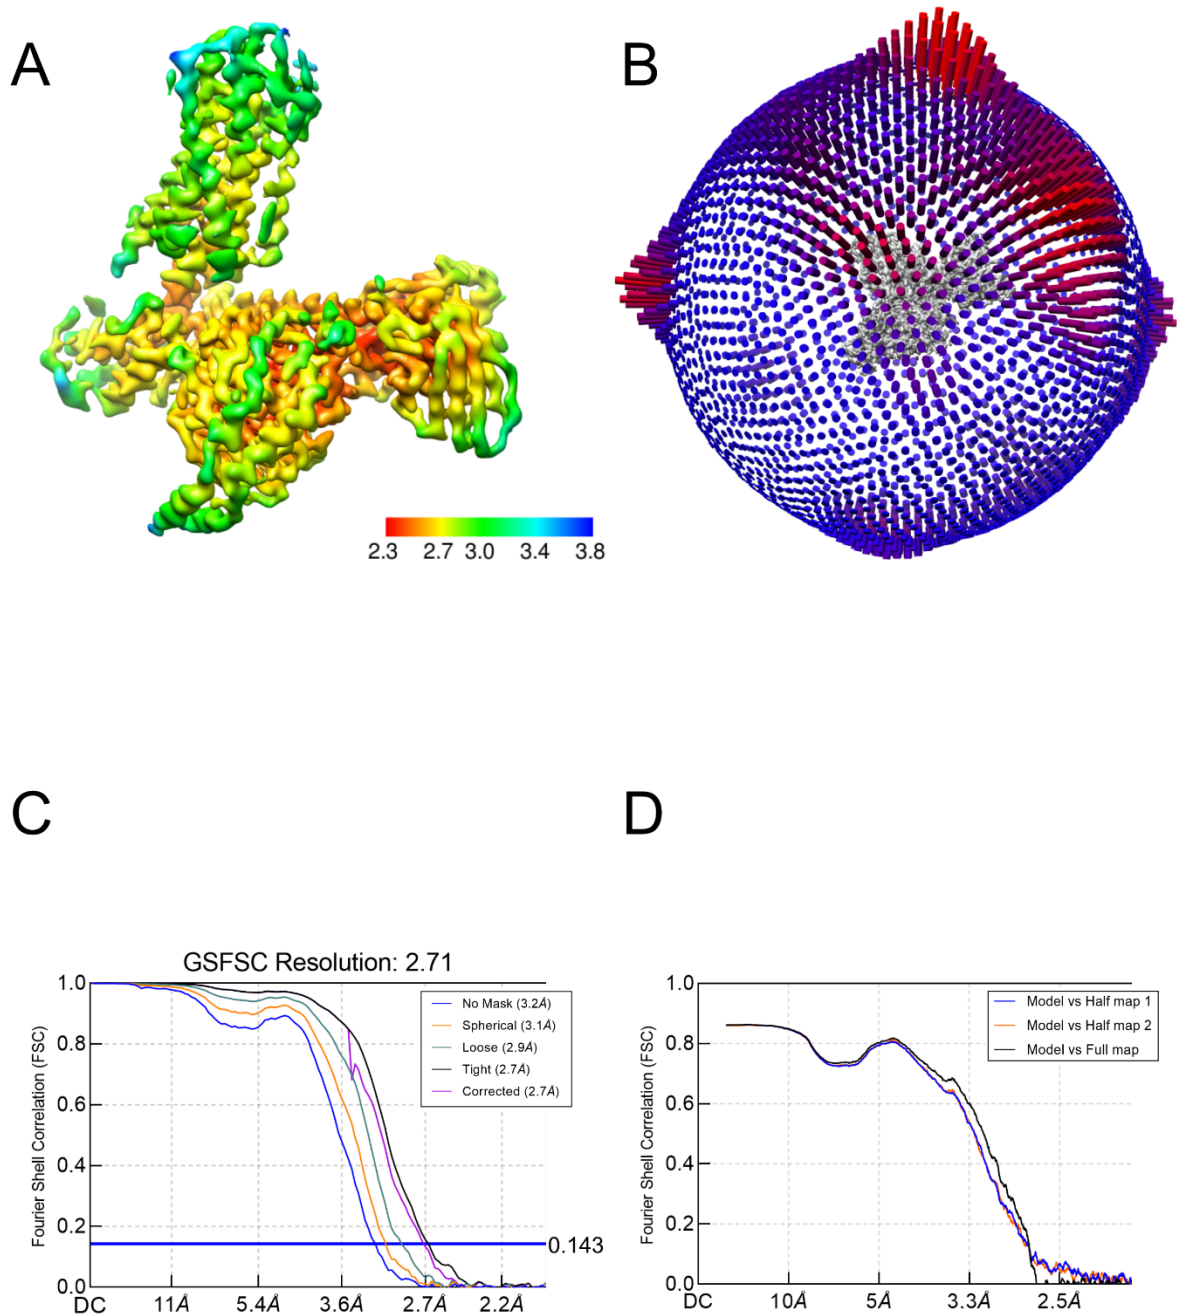

**Fig. S4. Resolution of the NK<sub>1</sub>R:SP:G<sub>q</sub>:scFv16 complex.**

**(A)** Local resolution analysis of the NK<sub>1</sub>R:SP:G<sub>q</sub>:scFv16 complex.

**(B)** Angular distribution of the particle orientations of the NK<sub>1</sub>R:SP:G<sub>q</sub>:scFv16 complex.

**(C)** The gold-standard Fourier shell correlation curves for the map of the NK<sub>1</sub>R:SP:G<sub>q</sub>:scFv16 complex.

**(D)** For cross validation, FSC curves of the refined model versus full map (black), refined map versus half map 1 (blue), and refined model versus half map 2 (orange) were calculated.

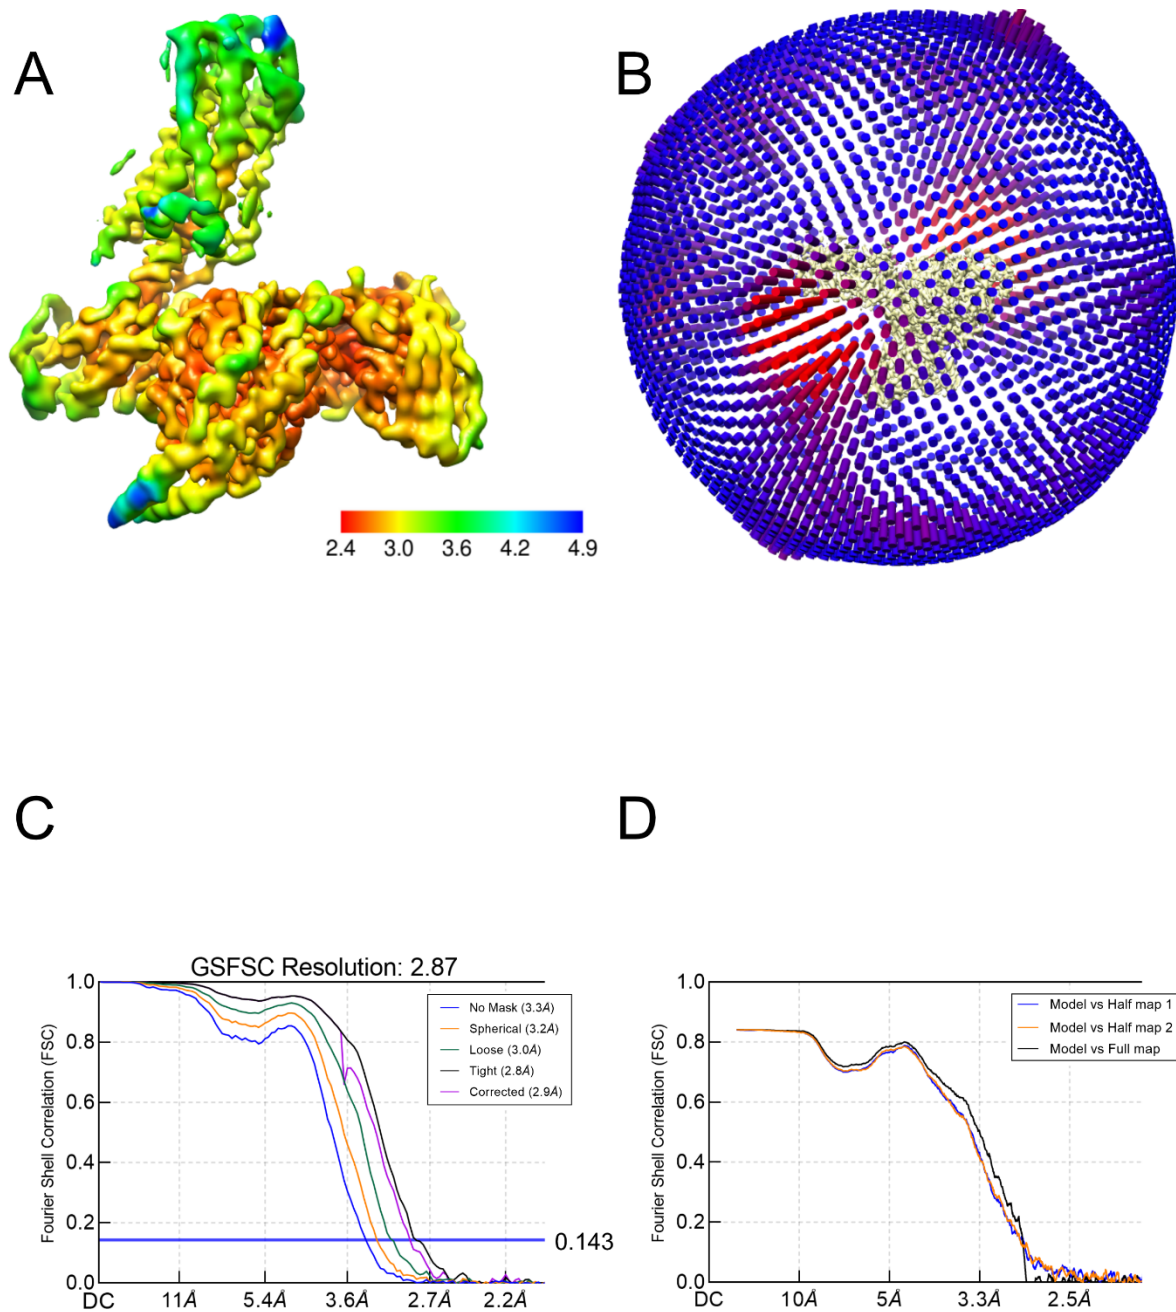

**Fig. S5. Resolution of the NK<sub>1</sub>R:SP:G<sub>s</sub>:scFv16 complex.**

(A) Local resolution analysis of the NK<sub>1</sub>R:SP:G<sub>s</sub>:scFv16 complex.

(B) Angular distribution of the particle orientations of the NK<sub>1</sub>R:SP:G<sub>s</sub>:scFv16 complex.

(C) The gold-standard Fourier shell correlation curves for the map of the NK<sub>1</sub>R:SP:G<sub>s</sub>:scFv16 complex.

(D) For cross validation, FSC curves of the refined model versus full map (black), refined map versus half map 1 (blue), and refined model versus half map 2 (orange) were calculated.

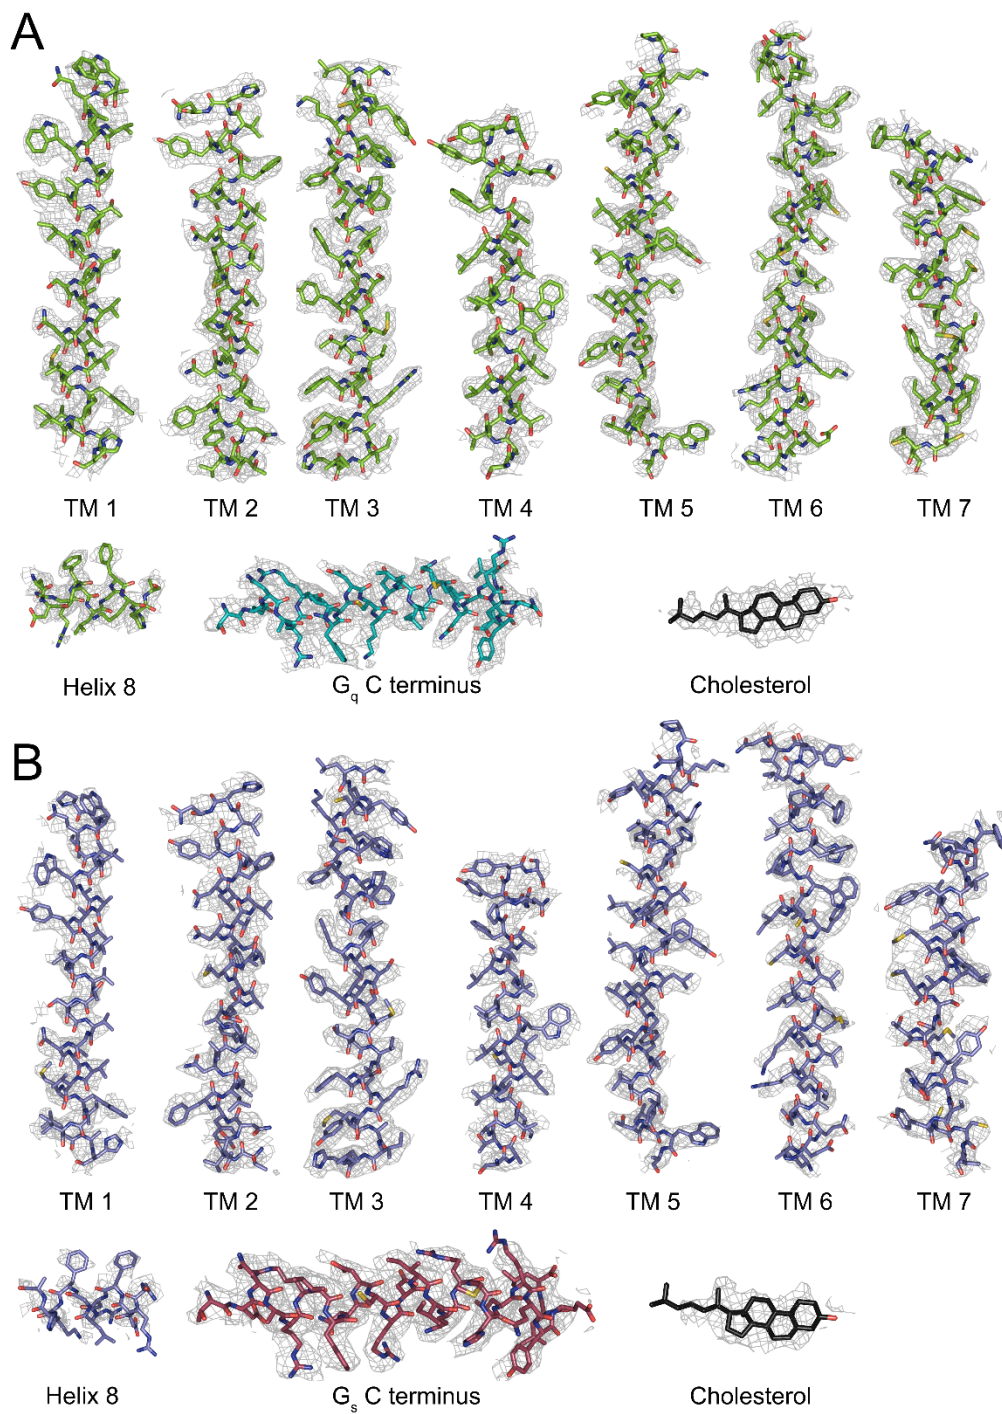

**Fig. S6. Cryo-EM density within NK<sub>1</sub>R.**

(A) Cryo-EM density maps are shown for G<sub>α</sub><sub>q</sub> Cα5 helix, cholesterol, NK<sub>1</sub>R helix 8, and all seven transmembrane α-helices of the NK<sub>1</sub>R:G<sub>q</sub> complex.

(B) Cryo-EM density maps are shown for G<sub>α</sub><sub>s</sub> Cα5 helix, cholesterol, NK<sub>1</sub>R helix 8, and all seven transmembrane α-helices of the NK<sub>1</sub>R:G<sub>s</sub> complex.

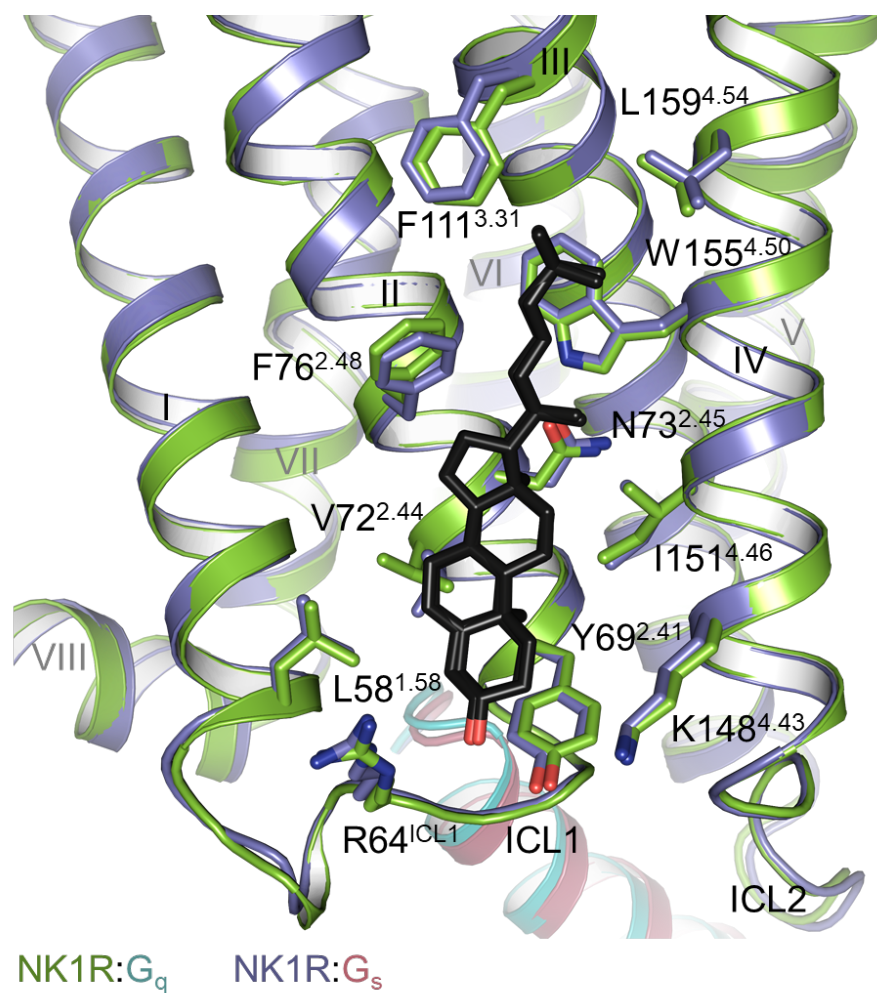

**Fig. S7. Cholesterol binding site in NK<sub>1</sub>R.**

Structural superposition of NK<sub>1</sub>R:G<sub>q</sub> and NK<sub>1</sub>R:G<sub>s</sub> with cholesterol shown in black. Residues within 4 Å distance of cholesterol are depicted as sticks.



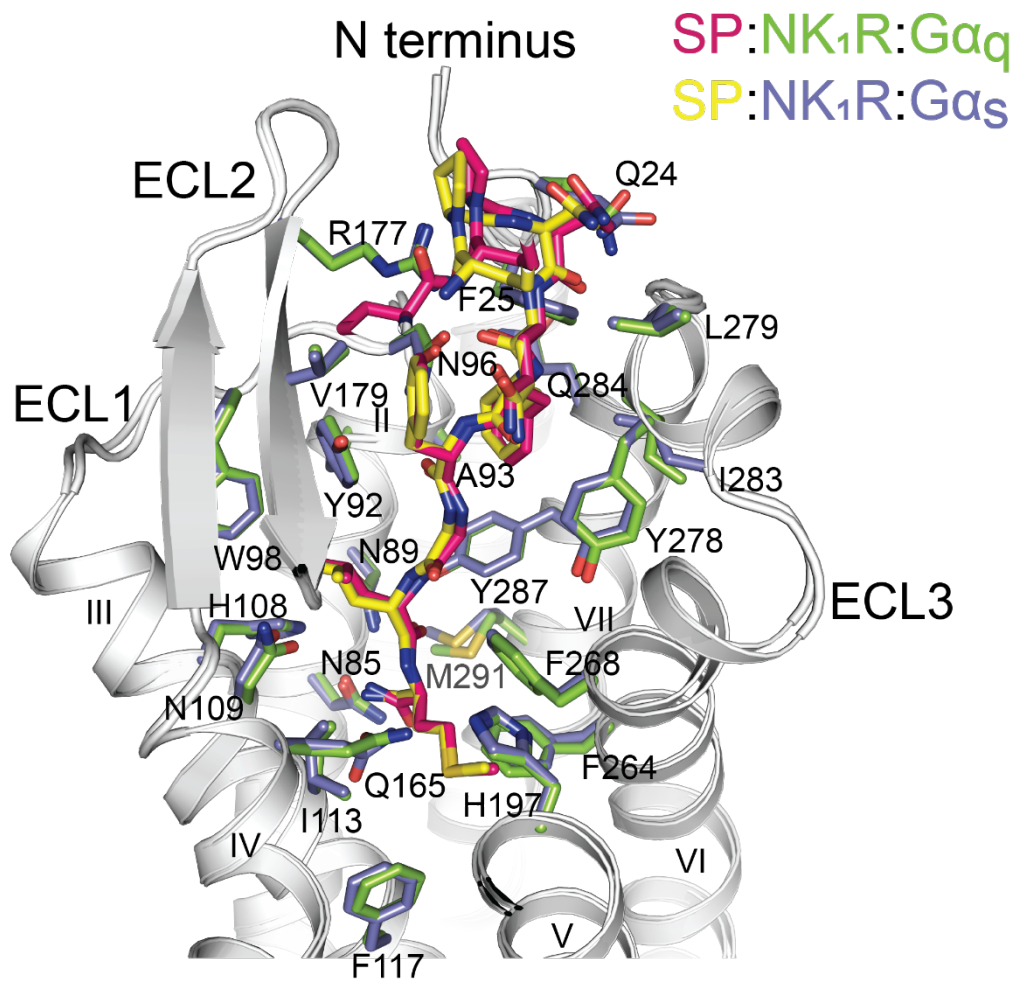

**Fig. S8. Structural superposition of the orthosteric SP binding pocket in NK<sub>1</sub>R:G<sub>q</sub> and NK<sub>1</sub>R:G<sub>s</sub>.**

SP and SP-interacting NK<sub>1</sub>R residues are shown as sticks in the respective color scheme of the complex.

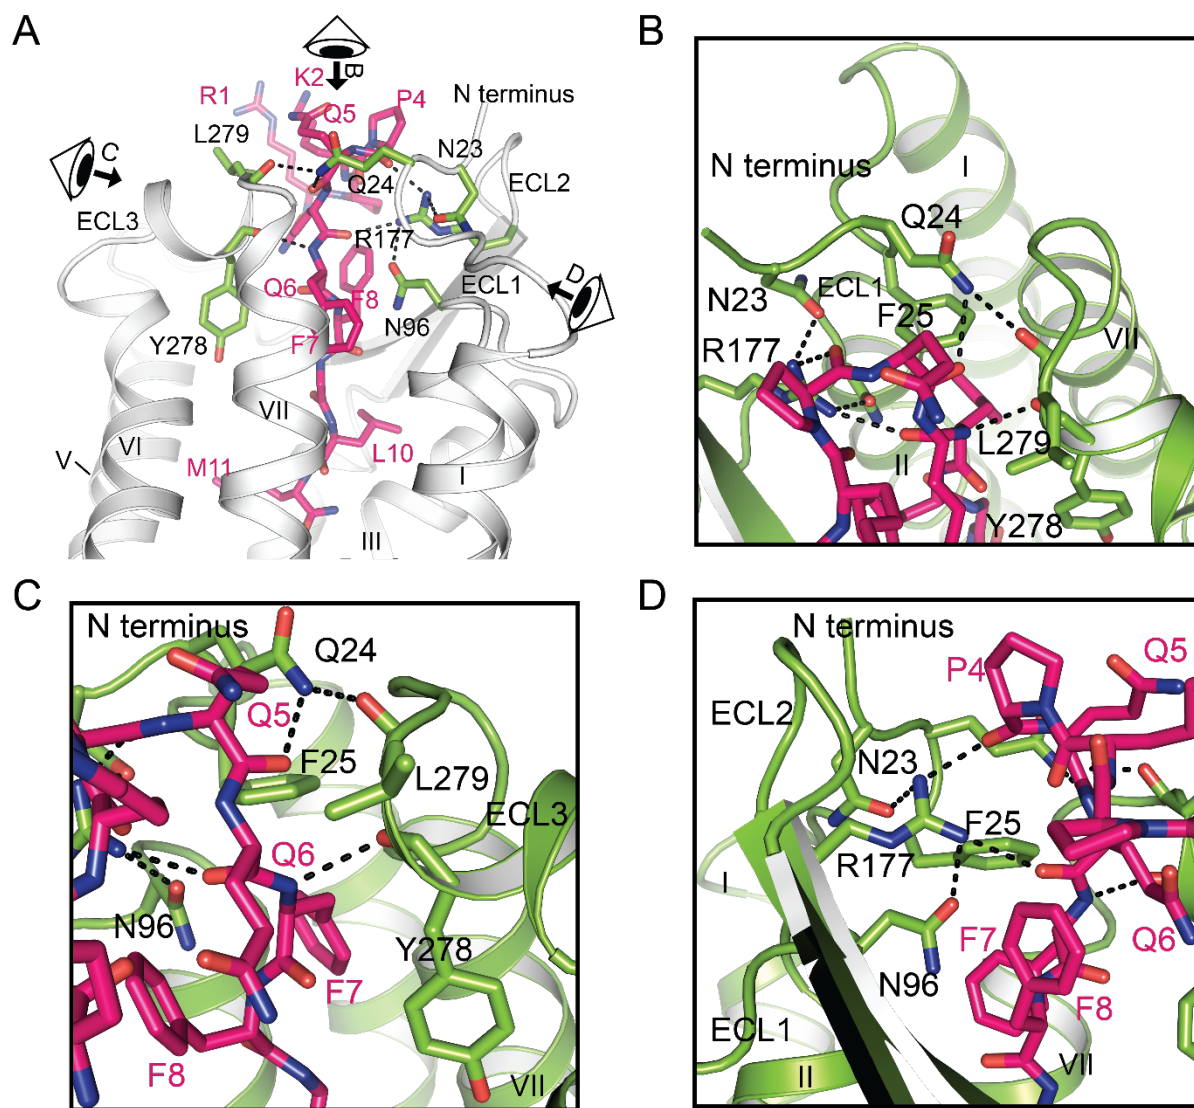

**Fig. S9. Close-up views on the extracellular hydrogen-bonding network established by SP.**

**(A)** Overview as in Fig. 2F with points of view for (B-D) indicated.

**(B to D)** Close-up views on the extracellular hydrogen-bonding network.

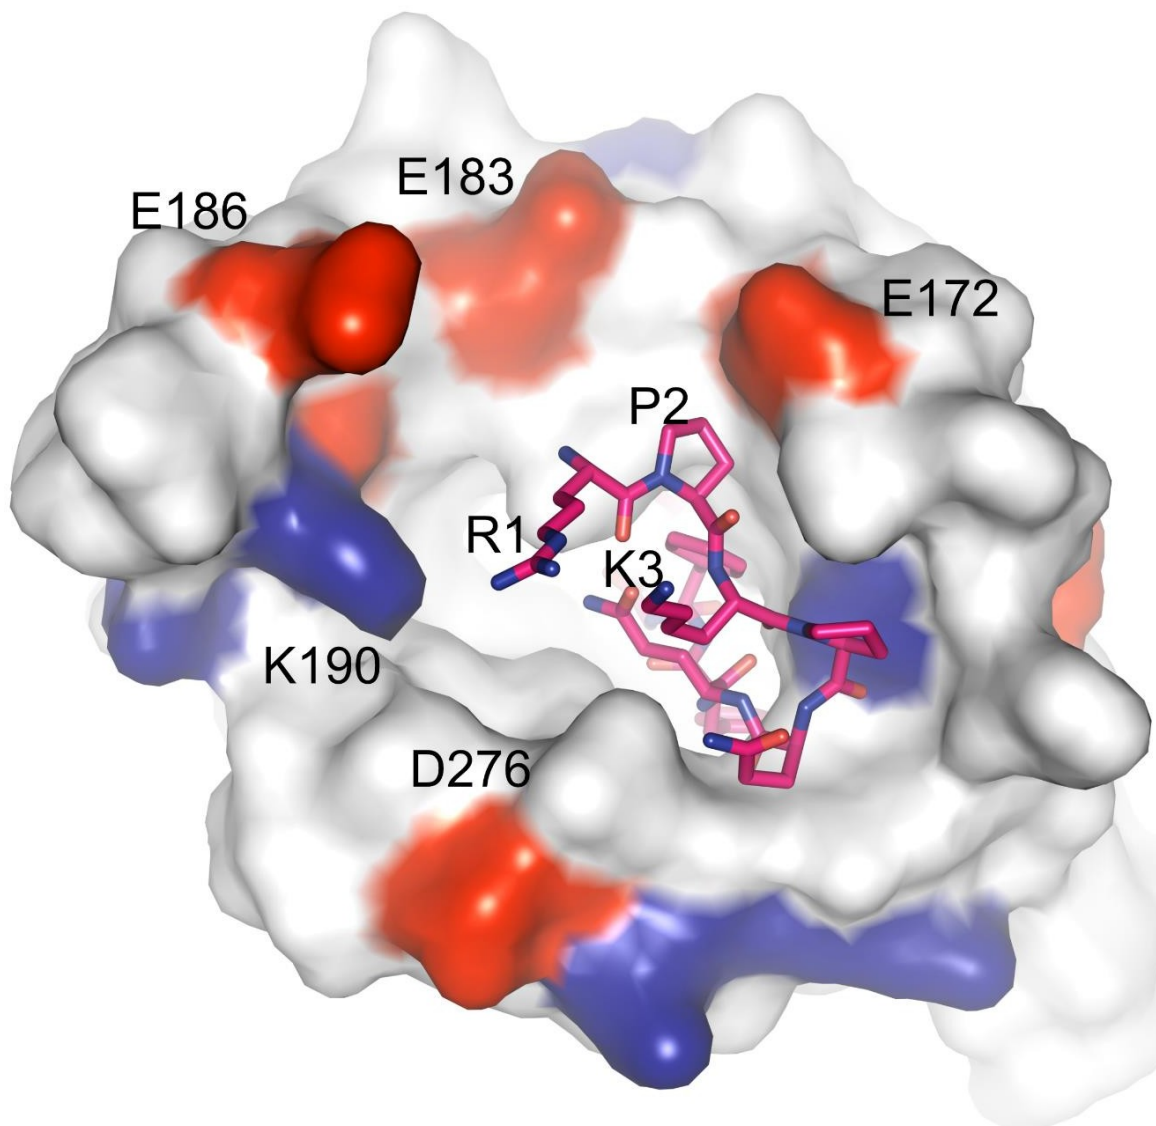

**Fig. S10. Charge distribution on the extracellular surface of NK<sub>1</sub>R.**

Extracellular view of a surface representation of the NK<sub>1</sub>R:SP complex with negatively charged residues in red (amino acids D and E), and positively charged residues in blue (amino acids R and K).

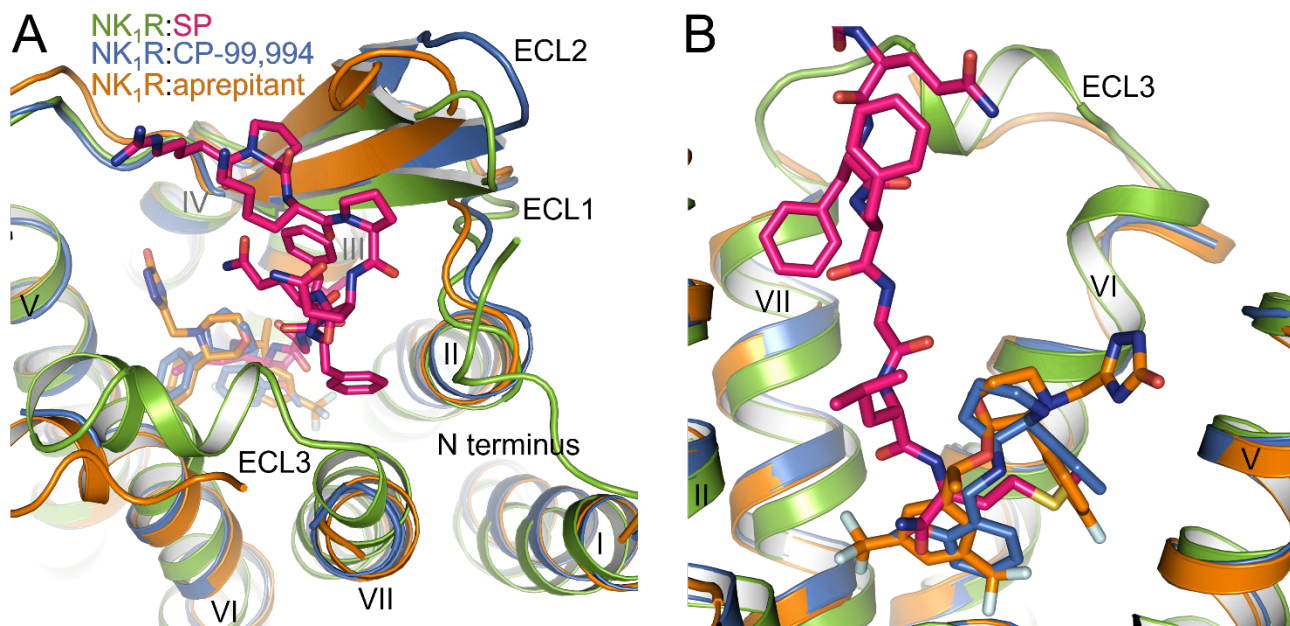

**Fig. S11. Comparison of NK<sub>1</sub>R:SP, NK<sub>1</sub>R:CP-99,994 and NK<sub>1</sub>R:aprepitant.**

**(A)** Superposition of NK<sub>1</sub>R:SP (G<sub>q</sub> complex), NK<sub>1</sub>R:CP-99,994 (PDB ID: 6HLL), and NK<sub>1</sub>R:aprepitant (PDB ID: 6HLO) as viewed from the extracellular space.

**(B)** Close-up view on the ligands bound in the orthosteric pocket.

**Table S1. Ligand binding data to NK<sub>1</sub>R with single amino acid mutations**

| construct              | K <sub>D</sub> [nM] | fold change<br>(to wt) | ΔpK <sub>D</sub><br>(to wt) | B <sub>max</sub><br>(%wt) | surface expression<br>(%wt) | n  |
|------------------------|---------------------|------------------------|-----------------------------|---------------------------|-----------------------------|----|
| NK <sub>1</sub> R (wt) | 7 ± 1               |                        |                             |                           |                             | 19 |
| N23A                   | 124 ± 17            | 17.6 ± 2.4             | -1.23 ± 0.06                | 88 ± 8                    | 135 ± 12                    | 5  |
| N23Q                   | 52 ± 5              | 7.3 ± 0.6              | -0.86 ± 0.04                | 102 ± 7                   | 151 ± 18                    | 4  |
| Q24A                   | 52 ± 6              | 7.4 ± 0.8              | -0.86 ± 0.05                | 101 ± 9                   | 103 ± 14                    | 4  |
| Q24N                   | 35 ± 2              | 5.0 ± 0.3              | -0.70 ± 0.02                | 115 ± 9                   | 154 ± 24                    | 4  |
| F25A                   | 109 ± 47            | 15.5 ± 6.6             | -1.02 ± 0.23                | 18 ± 3                    | 87 ± 13                     | 4  |
| F25Y                   | 11 ± 3              | 1.6 ± 0.4              | -0.14 ± 0.12                | 72 ± 15                   | 79 ± 29                     | 4  |
| N85A                   | 59 ± 5              | 8.3 ± 0.7              | -0.92 ± 0.04                | 89 ± 5                    | 125 ± 6                     | 3  |
| N85D                   | 71 ± 19             | 10.1 ± 2.7             | -0.96 ± 0.12                | 65 ± 4                    | 85 ± 8                      | 4  |
| N85Q                   | 72 ± 26             | 10.3 ± 3.6             | -0.87 ± 0.16                | 57 ± 6                    | 86 ± 5                      | 6  |
| N89A                   | 251 ± 38            | 35.7 ± 5.4             | -1.54 ± 0.06                | 111 ± 14                  | 163 ± 25                    | 3  |
| N89D                   | 485 ± 211           | 69.0 ± 30.0            | -1.56 ± 0.29                | 64 ± 21                   | 120 ± 5                     | 5  |
| N89Q                   | 782 ± 222           | 111.2 ± 31.6           | -2.00 ± 0.10                | 110 ± 27                  | 125 ± 6                     | 4  |
| Y92A                   | 76 ± 5              | 10.8 ± 0.8             | -1.03 ± 0.03                | 54 ± 5                    | 74 ± 7                      | 3  |
| Y92F                   | 8 ± 2               | 1.1 ± 0.2              | -0.02 ± 0.09                | 62 ± 4                    | 87 ± 5                      | 3  |
| N96A                   | 62 ± 9              | 8.9 ± 1.3              | -0.94 ± 0.06                | 78 ± 8                    | 99 ± 12                     | 3  |
| N96D                   | 15 ± 2              | 2.2 ± 0.3              | -0.33 ± 0.05                | 86 ± 3                    | 122 ± 11                    | 3  |
| N96Q                   | 108 ± 8             | 15.4 ± 1.2             | -1.19 ± 0.03                | 107 ± 4                   | 133 ± 19                    | 3  |
| F117A                  | 66 ± 10             | 9.4 ± 1.4              | -0.96 ± 0.06                | 123 ± 5                   | 111 ± 15                    | 3  |
| Q165A                  | 77 ± 13             | 10.9 ± 1.9             | -1.02 ± 0.08                | 106 ± 1                   | 171 ± 45                    | 3  |
| R177A                  | 321 ± 143           | 45.7 ± 20.4            | -1.47 ± 0.18                | 56 ± 4                    | 88 ± 9                      | 6  |
| R177K                  | 419 ± 20            | 59.6 ± 2.9             | -1.77 ± 0.02                | 87 ± 4                    | 96 ± 9                      | 4  |
| V179A                  | 64 ± 10             | 9.2 ± 1.4              | -0.94 ± 0.07                | 86 ± 3                    | 103 ± 10                    | 5  |
| F264A                  | 32 ± 4              | 4.5 ± 0.6              | -0.65 ± 0.06                | 89 ± 10                   | 142 ± 26                    | 3  |
| F268A                  | 195 ± 20            | 27.7 ± 2.9             | -1.44 ± 0.04                | 138 ± 19                  | 216 ± 36                    | 3  |
| Y278A                  | 17 ± 5              | 2.4 ± 0.7              | -0.33 ± 0.10                | 111 ± 6                   | 140 ± 21                    | 4  |
| I283A                  | 115 ± 21            | 16.4 ± 3.0             | -1.19 ± 0.07                | 99 ± 6                    | 137 ± 29                    | 5  |
| Q284A                  | 93 ± 17             | 13.3 ± 2.4             | -1.10 ± 0.07                | 74 ± 7                    | 109 ± 17                    | 4  |
| Y287A                  | 218 ± 140           | 31.0 ± 19.9            | -1.30 ± 0.28                | 29 ± 14                   | 60 ± 11                     | 3  |
| M291A                  | 43 ± 12             | 6.1 ± 1.7              | -0.69 ± 0.19                | 57 ± 3                    | 85 ± 10                     | 4  |

Whole-cell specific saturation binding experiment of fluorescently labelled peptide SP-HL488 to HEK293T cells expressing wild-type and mutated NK<sub>1</sub>R variants. Binding curves were analyzed by global fitting to a one-site saturation binding equation. All values are expressed as mean ± SEM of the indicated number of independent experiments performed in duplicate. Cell surface expression was obtained by measuring fluorescence emission of SNAP-Lumi4-Tb-labeled receptors.

**Table S2. List of contacts between NK<sub>1</sub>R and Gα<sub>s</sub>**

| <b>Gα<sub>s</sub> residue</b> | <b>Gα<sub>s</sub> portion</b> | <b>NK<sub>1</sub>R residue</b>                                                                                       | <b>NK<sub>1</sub>R portion</b> | <b>Type of interaction</b>                                                                                           |
|-------------------------------|-------------------------------|----------------------------------------------------------------------------------------------------------------------|--------------------------------|----------------------------------------------------------------------------------------------------------------------|
| R31 <sup>hns1.02</sup>        | hns1 loop                     | R141 <sup>ICL2</sup><br>S143 <sup>4.38</sup>                                                                         | ICL2<br>IV                     | Hydrogen bond with peptide backbone<br>Hydrogen bond                                                                 |
| H34 <sup>S1.02</sup>          | S1 loop                       | L138 <sup>ICL2</sup>                                                                                                 | ICL2                           | Hydrogen bond with peptide backbone /<br>Nonbonded contact                                                           |
| V210 <sup>S3.01</sup>         | S3 loop                       | L138 <sup>ICL2</sup><br>Q139 <sup>ICL2</sup>                                                                         | ICL2<br>ICL2                   | Nonbonded contact<br>Nonbonded contact                                                                               |
| F212 <sup>S3.03</sup>         |                               | L138 <sup>ICL2</sup>                                                                                                 | ICL2                           | Nonbonded contact                                                                                                    |
| F359 <sup>H5.08</sup>         | Ca5                           | L138 <sup>ICL2</sup>                                                                                                 | ICL2                           | Nonbonded contact                                                                                                    |
| C362 <sup>H5.11</sup>         | Ca5                           | L138 <sup>ICL2</sup>                                                                                                 | ICL2                           | Nonbonded contact                                                                                                    |
| R363 <sup>H5.12</sup>         | Ca5                           | I135 <sup>3.55</sup><br>P137 <sup>ICL2</sup><br>L138 <sup>ICL2</sup>                                                 | III<br>ICL2<br>ICL2            | Hydrogen bond with peptide backbone<br>Nonbonded contact<br>Nonbonded contact                                        |
| I366 <sup>H5.15</sup>         | Ca5                           | P137 <sup>ICL2</sup><br>L138 <sup>ICL2</sup>                                                                         | ICL2<br>ICL2                   | Nonbonded contact<br>Nonbonded contact                                                                               |
| Q367 <sup>H5.16</sup>         | Ca5                           | I134 <sup>3.54</sup><br>P137 <sup>ICL2</sup><br>L223 <sup>5.65</sup>                                                 | III<br>ICL2<br>V               | Hydrogen bond with peptide backbone /<br>Nonbonded contact<br>Nonbonded contact<br>Nonbonded contact                 |
| R368 <sup>H5.17</sup>         | Ca5                           | Q239 <sup>6.26</sup>                                                                                                 | VI                             | Nonbonded contact                                                                                                    |
| H370 <sup>H5.19</sup>         | Ca5                           | A133 <sup>3.53</sup><br>P137 <sup>ICL2</sup>                                                                         | III<br>ICL2                    | Nonbonded contact<br>Hydrogen bond with peptide backbone                                                             |
| Q373 <sup>H5.22</sup>         | Ca5                           | T67 <sup>2.39</sup>                                                                                                  | II                             | Hydrogen bond                                                                                                        |
| Y374 <sup>H5.23</sup>         | Ca5                           | T67 <sup>2.39</sup><br>D129 <sup>3.49</sup><br>A133 <sup>3.53</sup><br>R141 <sup>ICL2</sup>                          | II<br>III<br>III<br>ICL2       | Nonbonded contact<br>Nonbonded contact<br>Nonbonded contact<br>Nonbonded contact                                     |
| L376 <sup>H5.25</sup>         | Ca5                           | R130 <sup>3.50</sup><br>I134 <sup>3.54</sup><br>V246 <sup>6.33</sup><br>M249 <sup>6.36</sup><br>L308 <sup>7.56</sup> | III<br>III<br>VI<br>VI<br>VII  | Nonbonded contact<br>Nonbonded contact<br>Nonbonded contact<br>Nonbonded contact<br>Nonbonded contact                |
| L377 <sup>H5.26</sup>         | Ca5                           | A242 <sup>6.29</sup><br>V246 <sup>6.33</sup><br>L308 <sup>7.56</sup><br>N309 <sup>8.47</sup>                         | VI<br>VI<br>VII<br>VIII        | Nonbonded contact<br>Nonbonded contact<br>Hydrogen bond with peptide backbone<br>Hydrogen bond with peptide backbone |

**Table S3. List of contacts between NK<sub>1</sub>R and Gα<sub>q</sub>**

| Gα <sub>q</sub> residue | Gα <sub>q</sub> portion | NK <sub>1</sub> R residue                                                                                            | NK <sub>1</sub> R portion     | Type of interaction                                                                                                  |
|-------------------------|-------------------------|----------------------------------------------------------------------------------------------------------------------|-------------------------------|----------------------------------------------------------------------------------------------------------------------|
| R31 <sup>hns1.02</sup>  | hns1 loop               | R141 <sup>ICL2</sup><br>S143 <sup>4.38</sup>                                                                         | ICL2<br>IV                    | Hydrogen bond with peptide backbone<br>Hydrogen bond                                                                 |
| H34 <sup>S1.02</sup>    | S1 loop                 | L138 <sup>ICL2</sup>                                                                                                 | ICL2                          | Hydrogen bond with peptide backbone /<br>Nonbonded contact                                                           |
| V210 <sup>S3.01</sup>   | S3 loop                 | L138 <sup>ICL2</sup><br>Q139 <sup>6.26</sup>                                                                         | ICL2<br>VI                    | Nonbonded contact<br>Nonbonded contact                                                                               |
| F212 <sup>S3.03</sup>   | S3 loop                 | L138 <sup>ICL2</sup>                                                                                                 | ICL2                          | Nonbonded contact                                                                                                    |
| F359 <sup>H5.08</sup>   | Cα5                     | L138 <sup>ICL2</sup>                                                                                                 | ICL2                          | Nonbonded contact                                                                                                    |
| C362 <sup>H5.11</sup>   | Cα5                     | L138 <sup>ICL2</sup>                                                                                                 | ICL2                          | Nonbonded contact                                                                                                    |
| K363 <sup>H5.12</sup>   | Cα5                     | P137 <sup>ICL2</sup><br>L138 <sup>ICL2</sup>                                                                         | ICL2<br>ICL2                  | Nonbonded contact<br>Nonbonded contact                                                                               |
| I366 <sup>H5.15</sup>   | Cα5                     | P137 <sup>ICL2</sup><br>L138 <sup>ICL2</sup>                                                                         | ICL2<br>ICL2                  | Nonbonded contact<br>Nonbonded contact                                                                               |
| L367 <sup>H5.16</sup>   | Cα5                     | I134 <sup>3.54</sup>                                                                                                 | III                           | Nonbonded contact                                                                                                    |
| Q368 <sup>H5.17</sup>   | Cα5                     | Q239 <sup>6.26</sup>                                                                                                 | VI                            | Hydrogen bond                                                                                                        |
| N370 <sup>H5.19</sup>   | Cα5                     | A133 <sup>3.53</sup>                                                                                                 | III                           | Hydrogen bond to peptide backbone                                                                                    |
| E373 <sup>H5.22</sup>   | Cα5                     | T67 <sup>2.39</sup>                                                                                                  | II                            | Hydrogen bond / Nonbonded contact                                                                                    |
| Y374 <sup>H5.23</sup>   | Cα5                     | T67 <sup>2.39</sup><br>D129 <sup>3.49</sup><br>A133 <sup>3.53</sup><br>R141 <sup>ICL2</sup>                          | II<br>III<br>III<br>ICL2      | Nonbonded contact<br>Nonbonded contact<br>Nonbonded contact<br>Nonbonded contact                                     |
| N375 <sup>H5.24</sup>   | Cα5                     | N68 <sup>2.40</sup><br>L71 <sup>2.43</sup><br>N309 <sup>8.47</sup><br>F312 <sup>8.50</sup>                           | II<br>II<br>VIII<br>VIII      | Hydrogen bond<br>Nonbonded contact<br>Hydrogen bond<br>Nonbonded contact                                             |
| L376 <sup>H5.25</sup>   | Cα5                     | R130 <sup>3.50</sup><br>I134 <sup>3.54</sup><br>V246 <sup>6.33</sup><br>M249 <sup>6.36</sup><br>L308 <sup>7.56</sup> | III<br>III<br>VI<br>VI<br>VII | Nonbonded contact<br>Nonbonded contact<br>Nonbonded contact<br>Nonbonded contact<br>Nonbonded contact                |
| V377 <sup>H5.26</sup>   | Cα5                     | A242 <sup>6.29</sup><br>V246 <sup>6.33</sup><br>L308 <sup>7.56</sup><br>N309 <sup>8.47</sup>                         | VI<br>VI<br>VII<br>VIII       | Nonbonded contact<br>Nonbonded contact<br>Hydrogen bond with peptide backbone<br>Hydrogen bond with peptide backbone |
